# Supplementary material
Source: publisher site journal article supplement (https://www.dovepress.com/article/553378)
Supplement: Supplementary file 1 [file SupplementaryMaterials.doc]

Supplementary Materials

[Supplementary Figures 1](#__RefHeading___Toc156323554)

[Supplementary Figure 1 Radial MR plot for testing the outliers of MDD on HZ. 2](#__RefHeading___Toc156323564)

[Supplementary Figure 2 The scatter plot, forest plot, leave-one-out figure of MDD on HZ and PHN.](#__RefHeading___Toc156323566) 3

[Supplementary Figure 3 The scatter plot, forest plot, leave-one-out figure of depressive status on HZ and PHN.](#__RefHeading___Toc156323568) 4

[Supplementary Figure 4 Radial MR plot for testing the outliers of depressive status on PHN .](#__RefHeading___Toc156323569) 5

[Supplementary Figure 5 The scatter plot, forest plot, leave-one-out figure of HZ on depressive status.](#__RefHeading___Toc156323570) 6

[Supplementary Figure 6 The scatter plot, forest plot, leave-one-out figure of zoster infection on depression-related consultation and depression-related consultation on zoster infection](#__RefHeading___Toc156323573) 7

[Supplementary Tables](#__RefHeading___Toc156323554) 8

[Supplementary Table 1](#__RefHeading___Toc156323564)

[STROBE-MR checklist of recommended items to address in reports of Mendelian randomization studies.](#__RefHeading___Toc156323564) 8

[Supplementary Table 2 Summary of Forward and Reverse MR analysis of exposures with outcomes.](#__RefHeading___Toc156323565) 12

[Supplementary Table 3 Summary of heterogeneity and pleiotropy test of MR analysis.](#__RefHeading___Toc156323566) 14

[Supplementary Table 4 Radial MR for testing the outliers of MDD on HZ.](#__RefHeading___Toc156323567) 15

[Supplementary Table 5 Summary of instrumental variables (IVs) details in MR analysis.](#__RefHeading___Toc156323568) 16

[Supplementary Table 6 Radial MR for testing the outliers of depressive status on PHN.](#__RefHeading___Toc156323568) 21


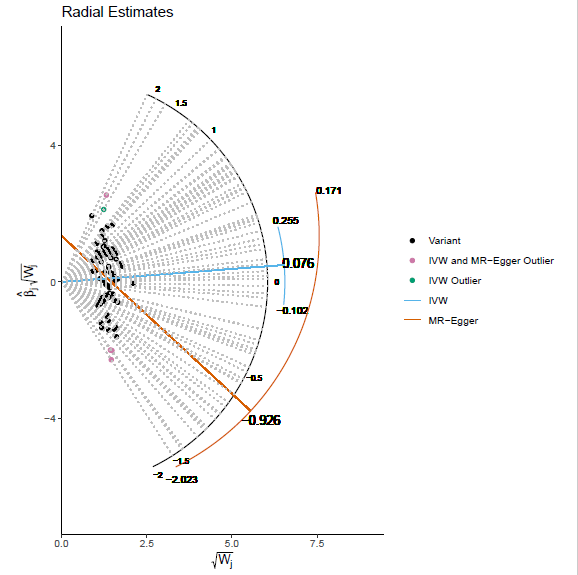


Supplementary Figure 1. Radial MR plot for testing the outliers of MDD on HZ


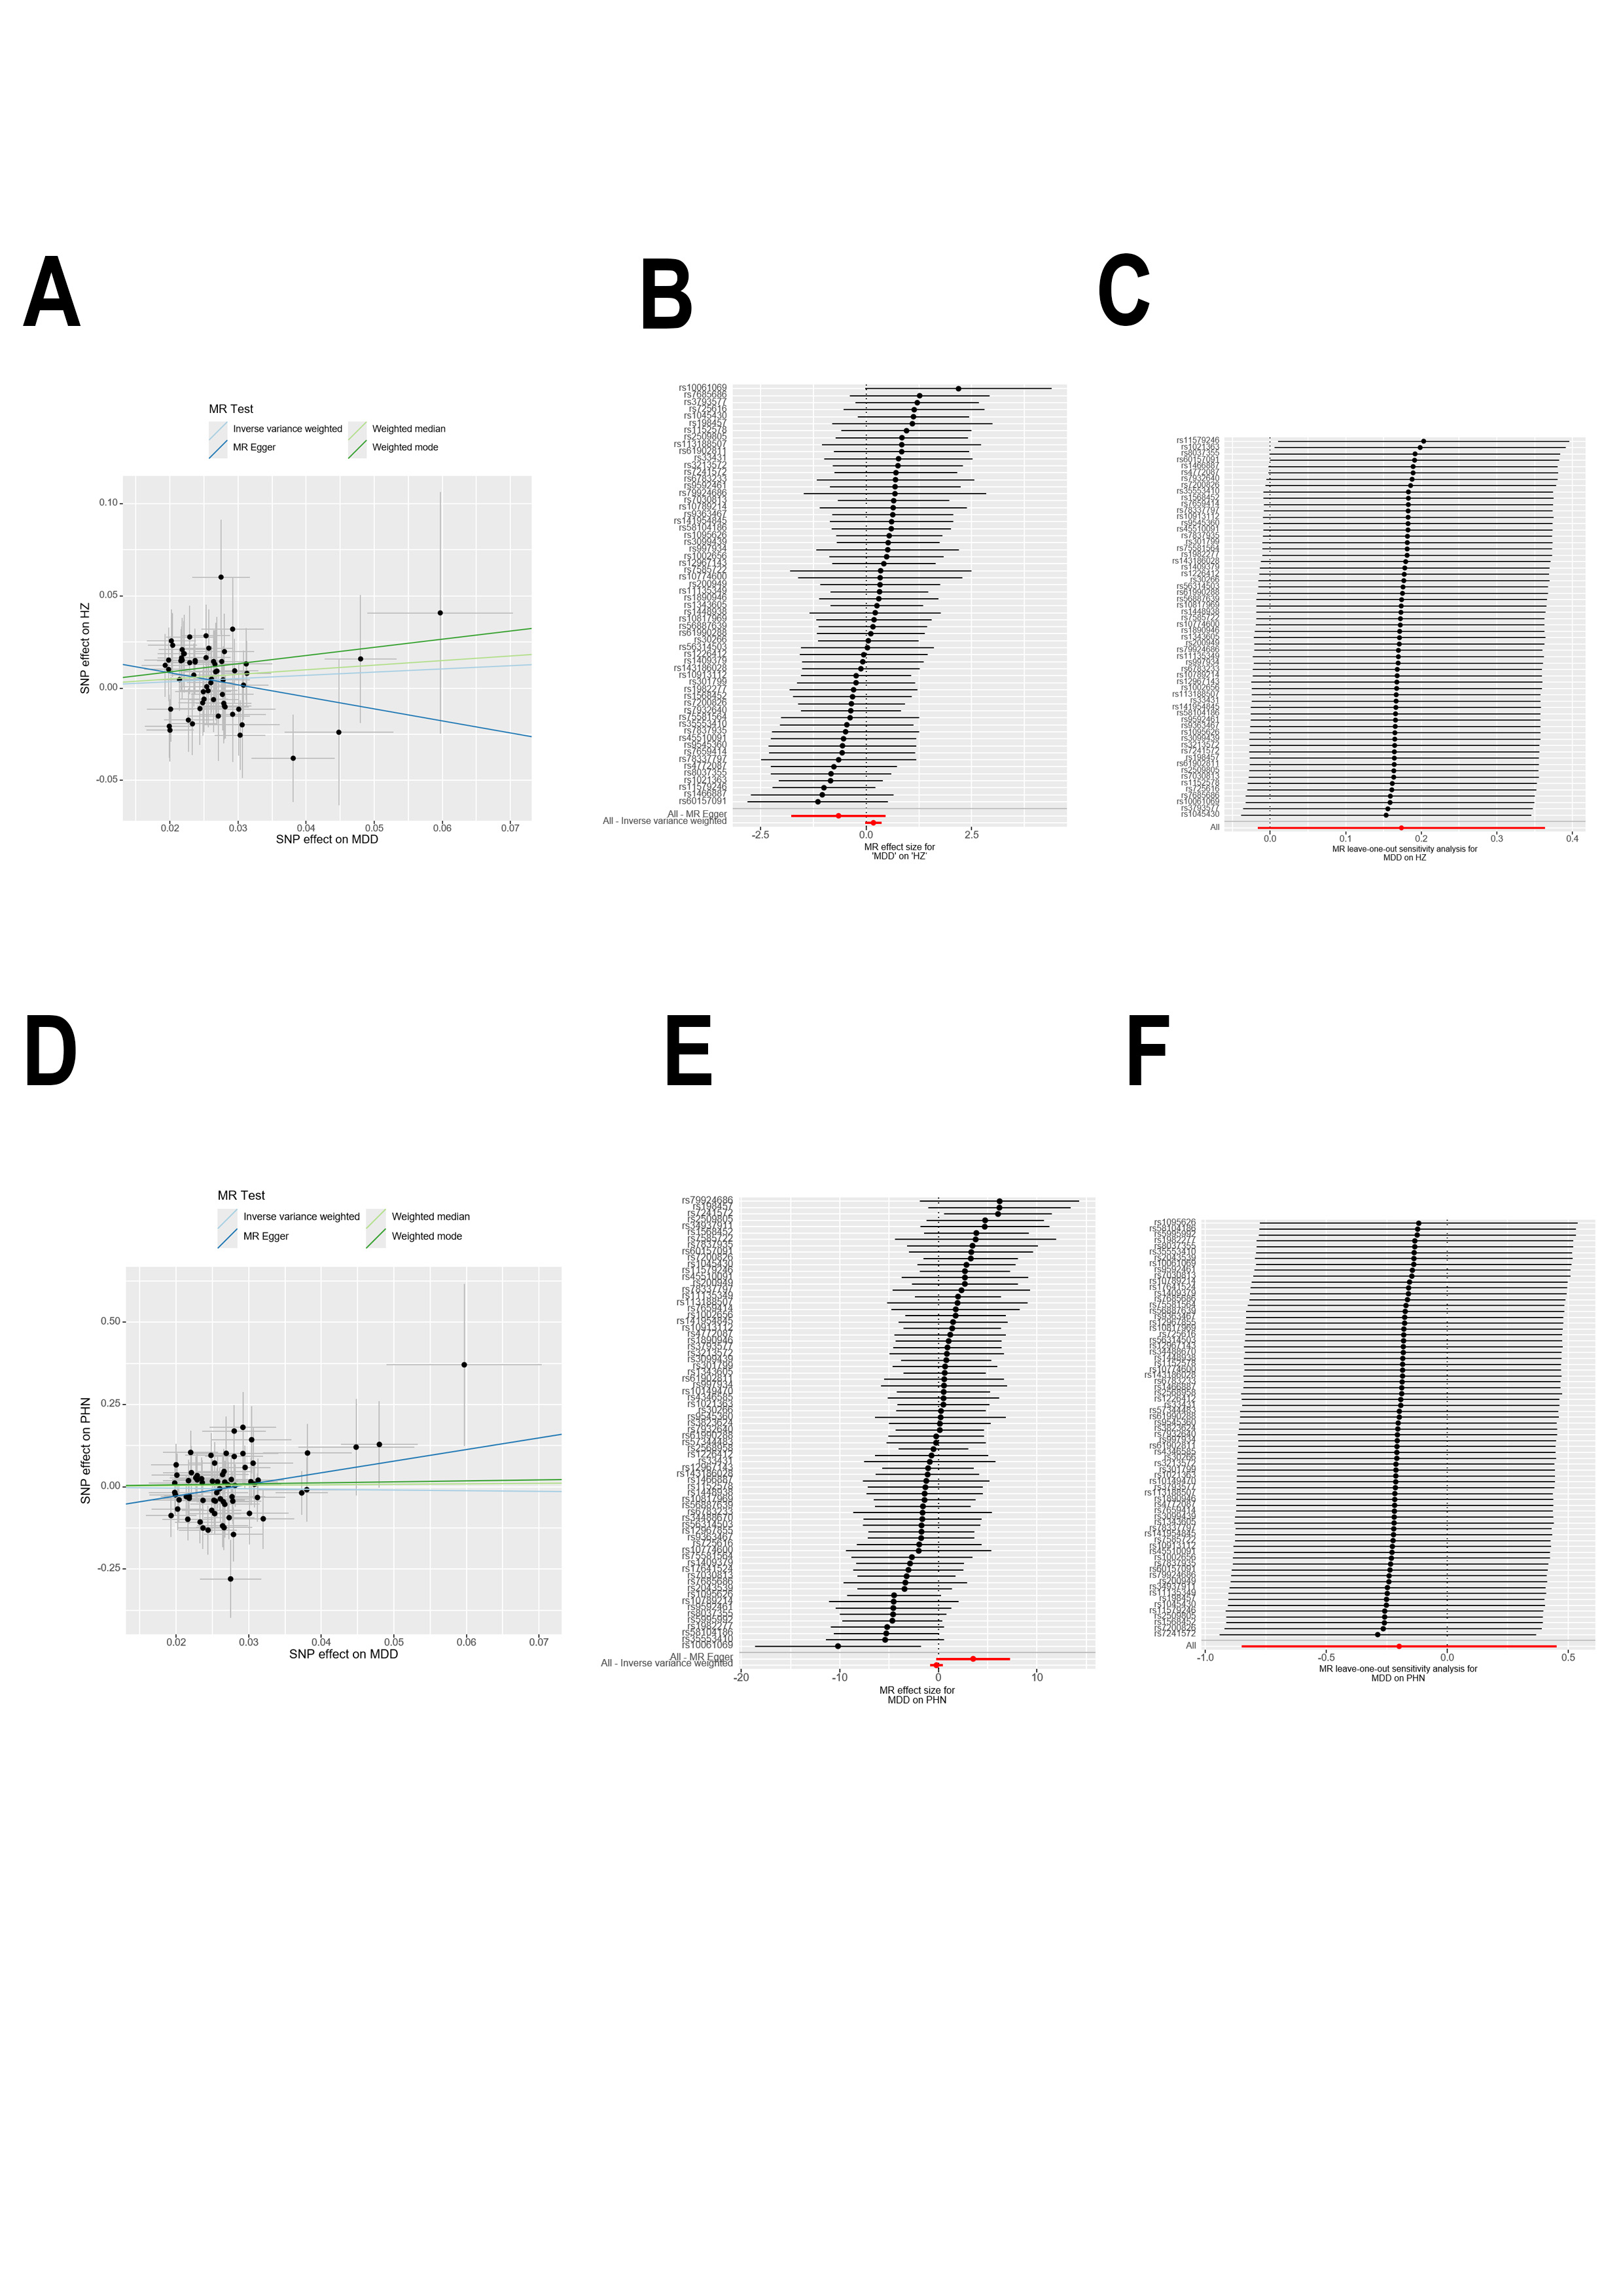


Supplementary Figure 2.

The scatter plot(A), forest plot(B), leave-one-out figure(C) of MDD on HZ;

The scatter plot(D), forest plot(E), leave-one-out figure(F) of MDD on PHN


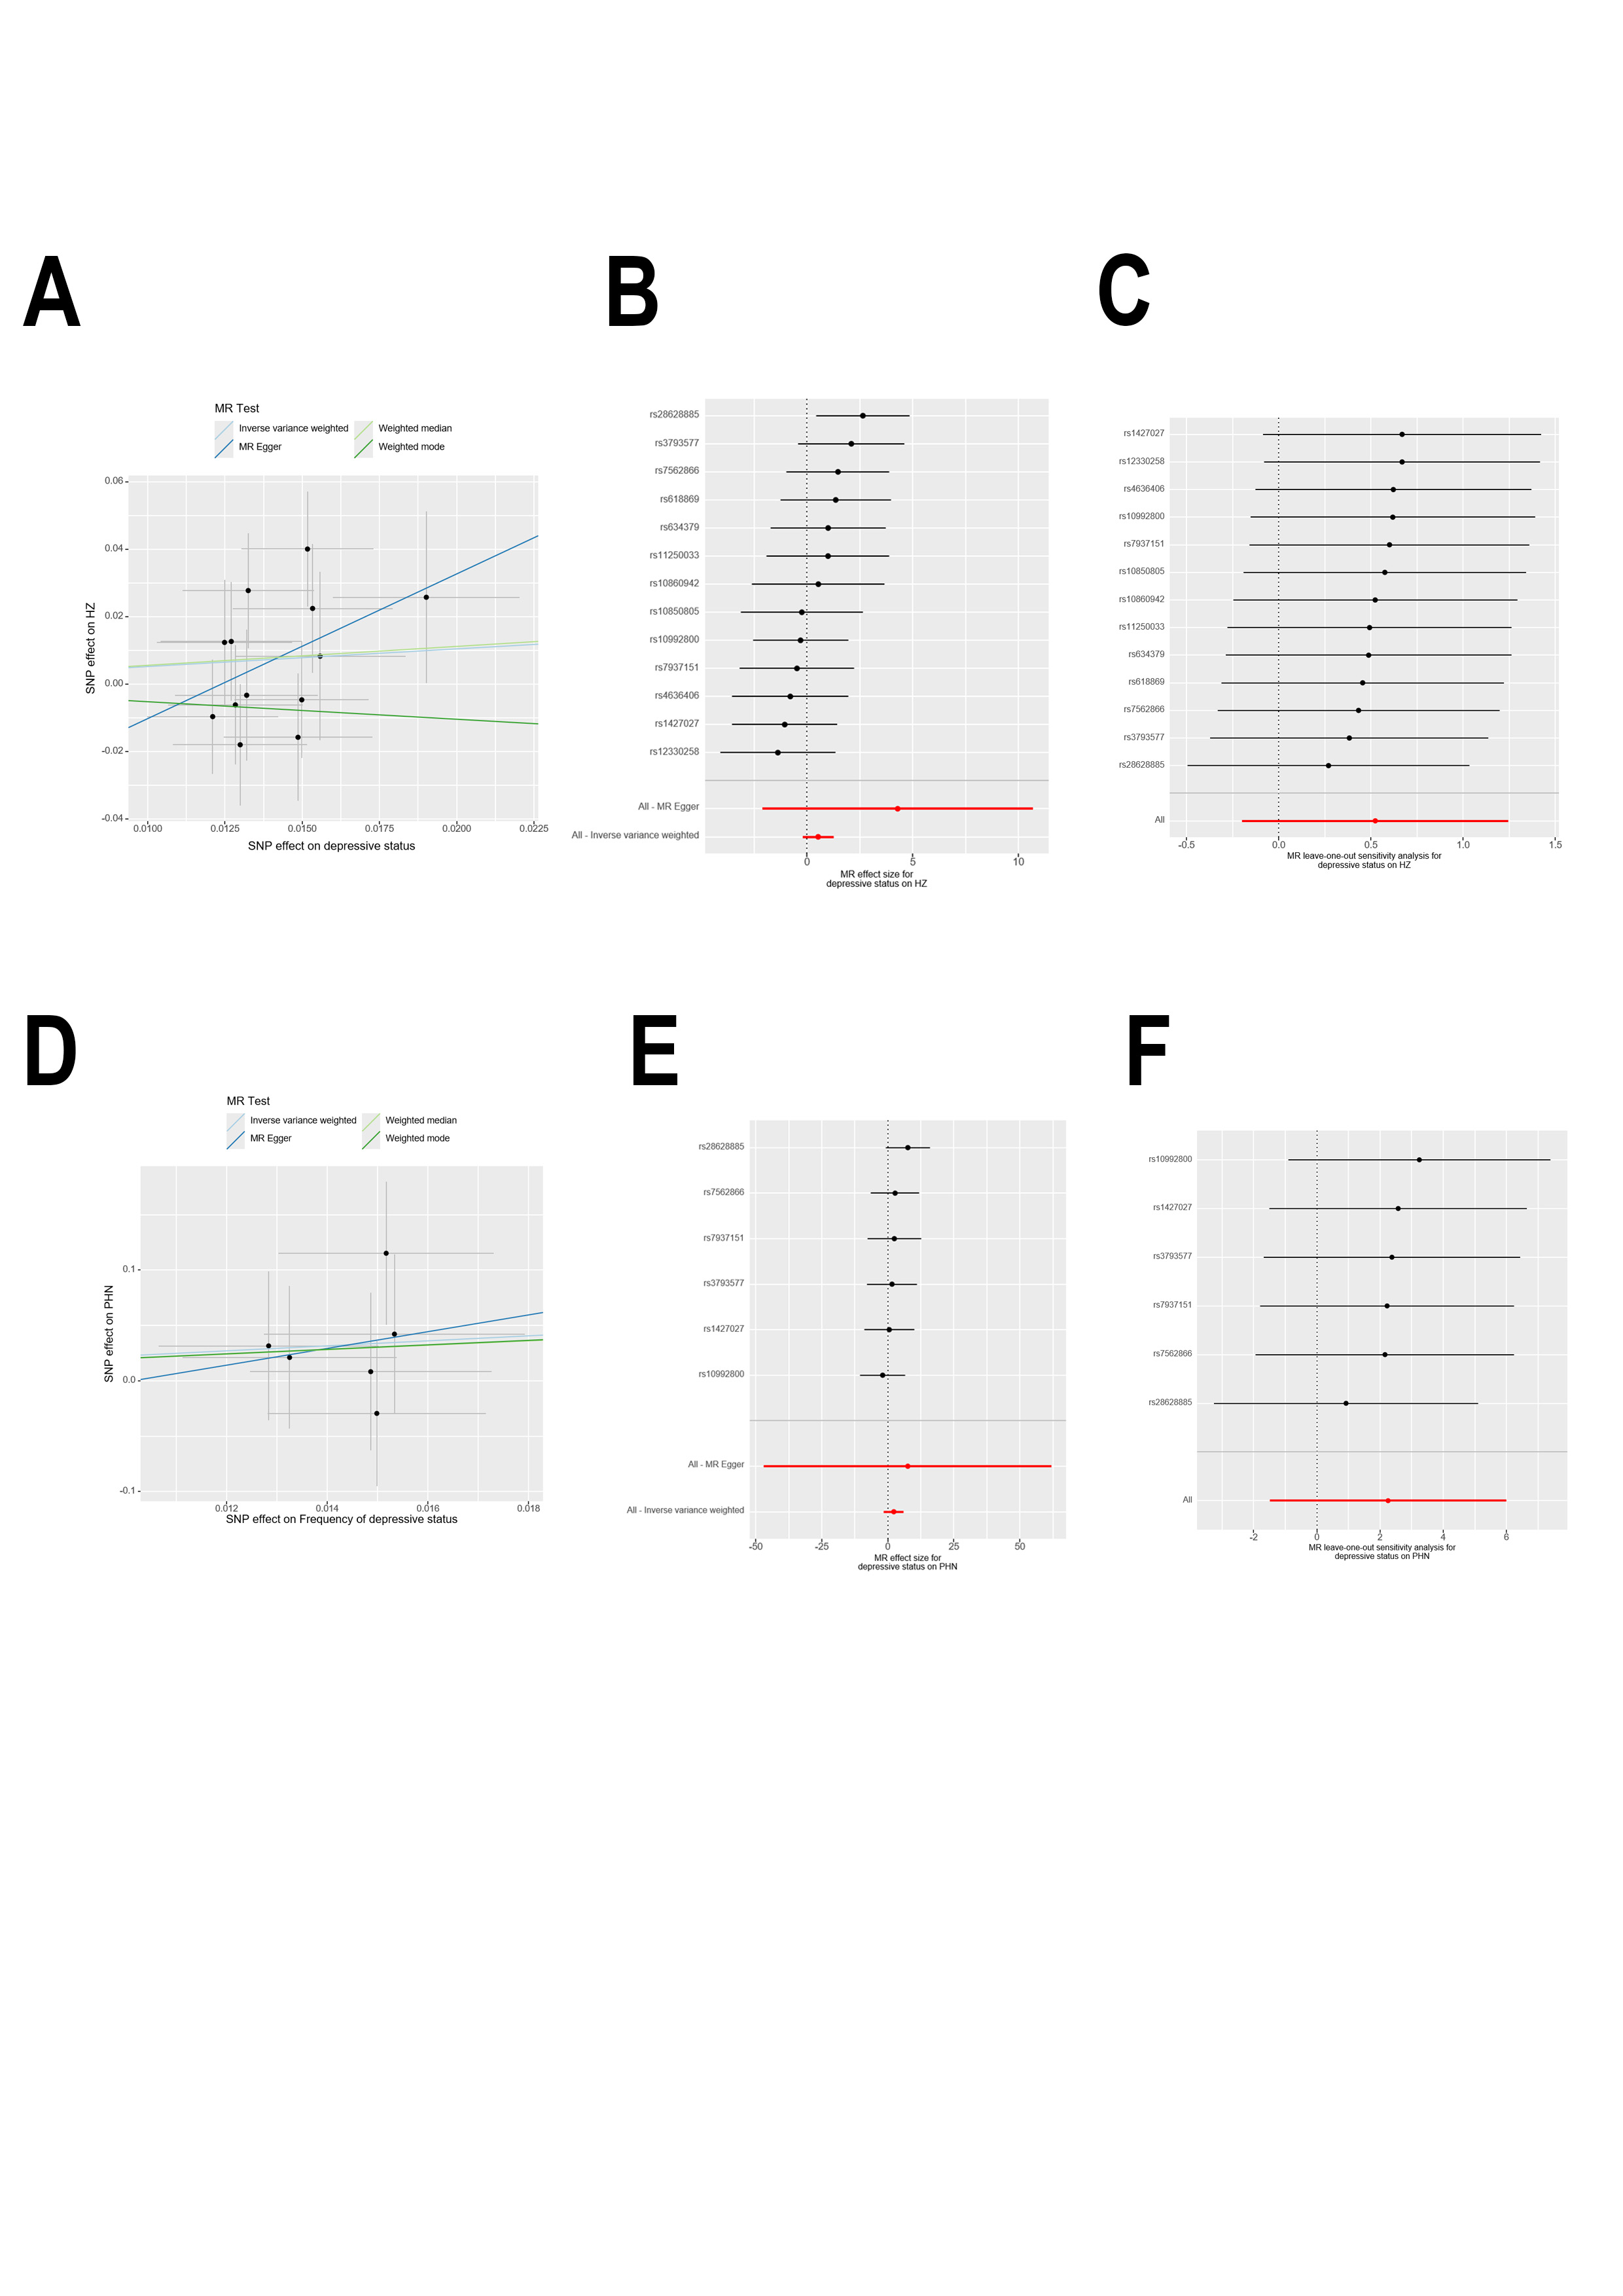


Supplementary Figure 3.

The scatter plot(A), forest plot(B), leave-one-out figure(C) of depressive status on HZ

The scatter plot(D), forest plot(E), leave-one-out figure(F) of depressive status on PHN


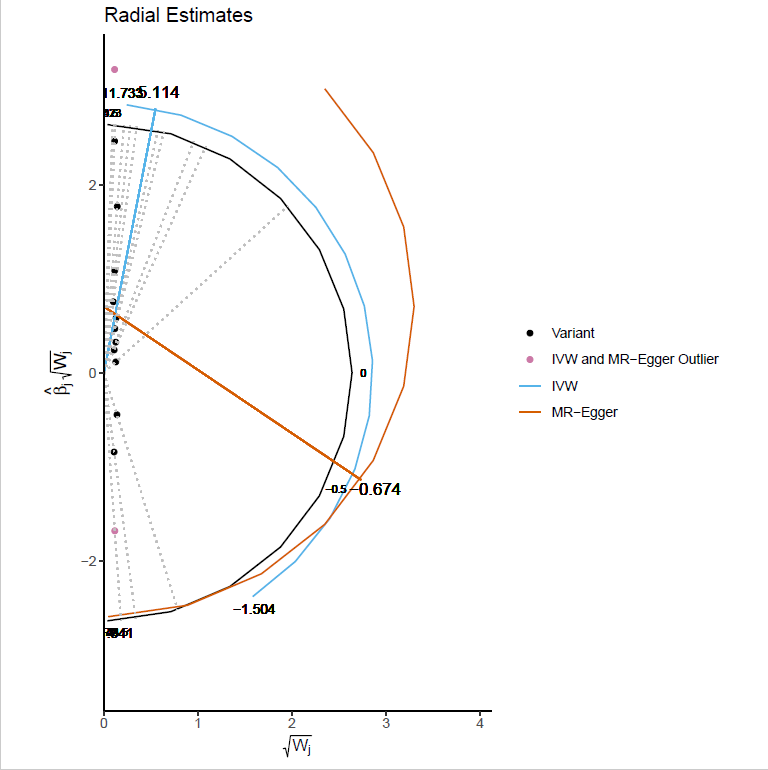


Supplementary Figure 4. Radial MR plot for testing the outliers of depressive status on PHN


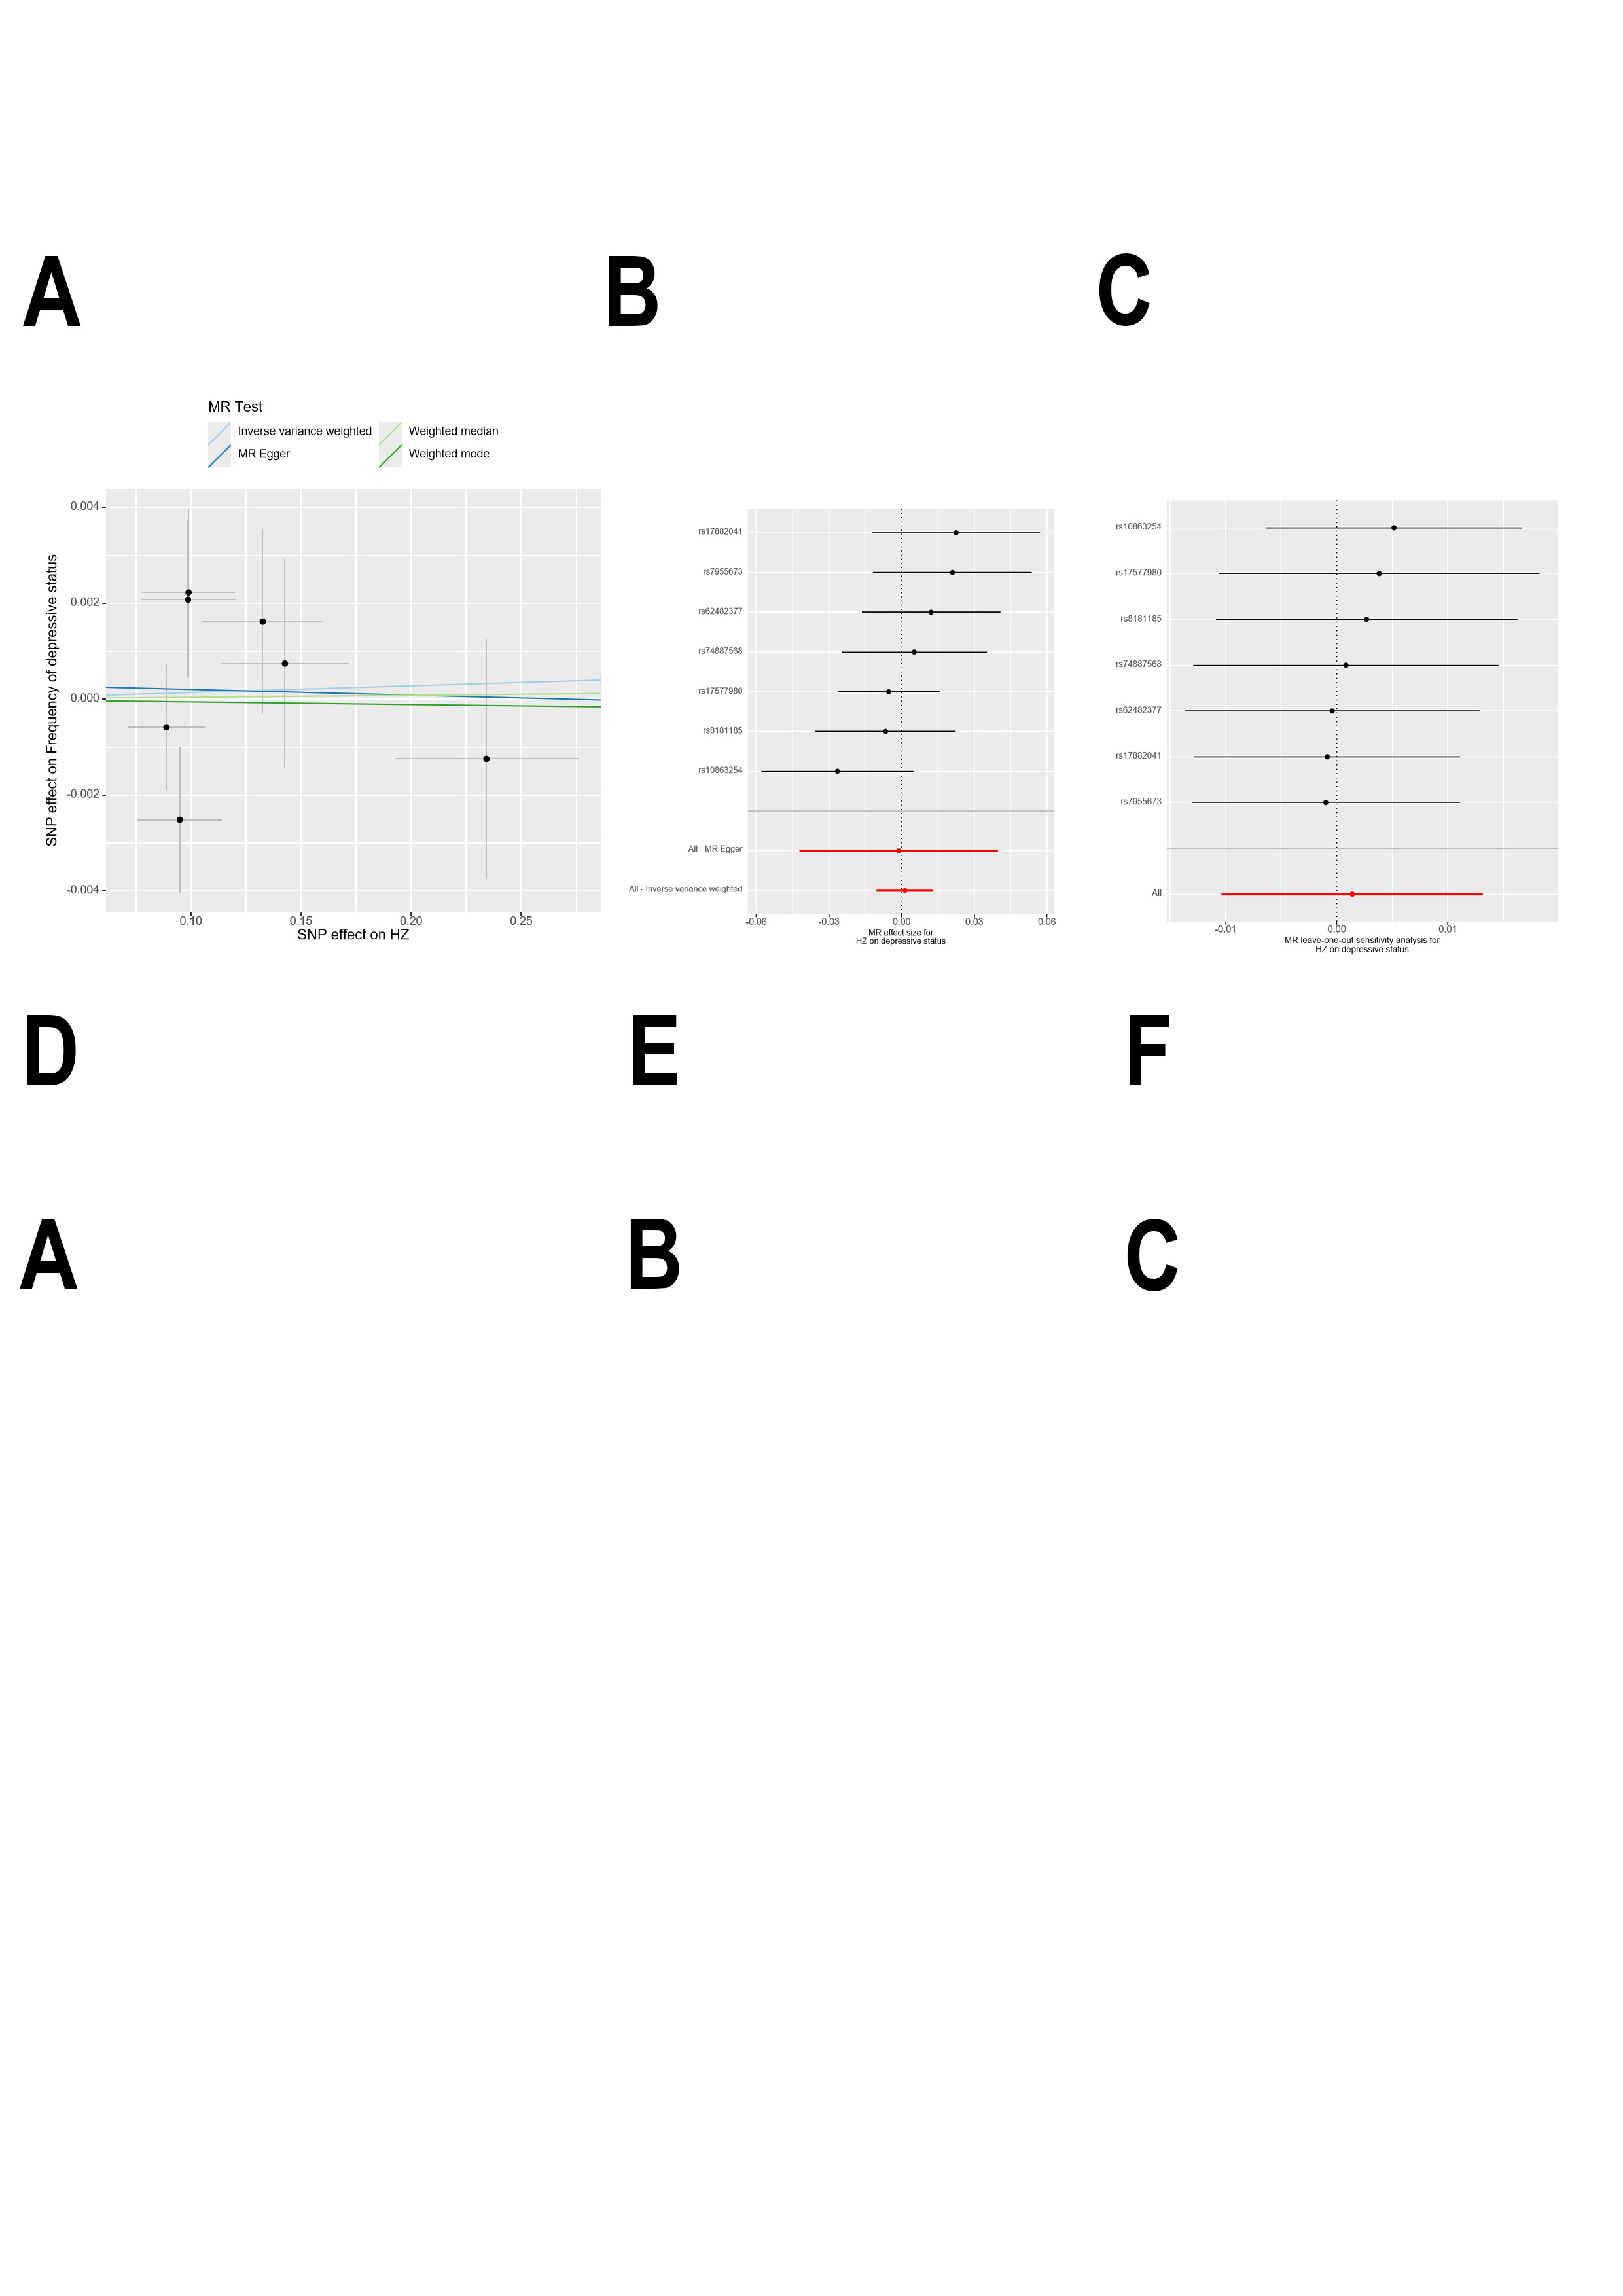


Supplementary Figure 5.

The scatter plot(A), forest plot(B), leave-one-out figure(C) of HZ on depressive status


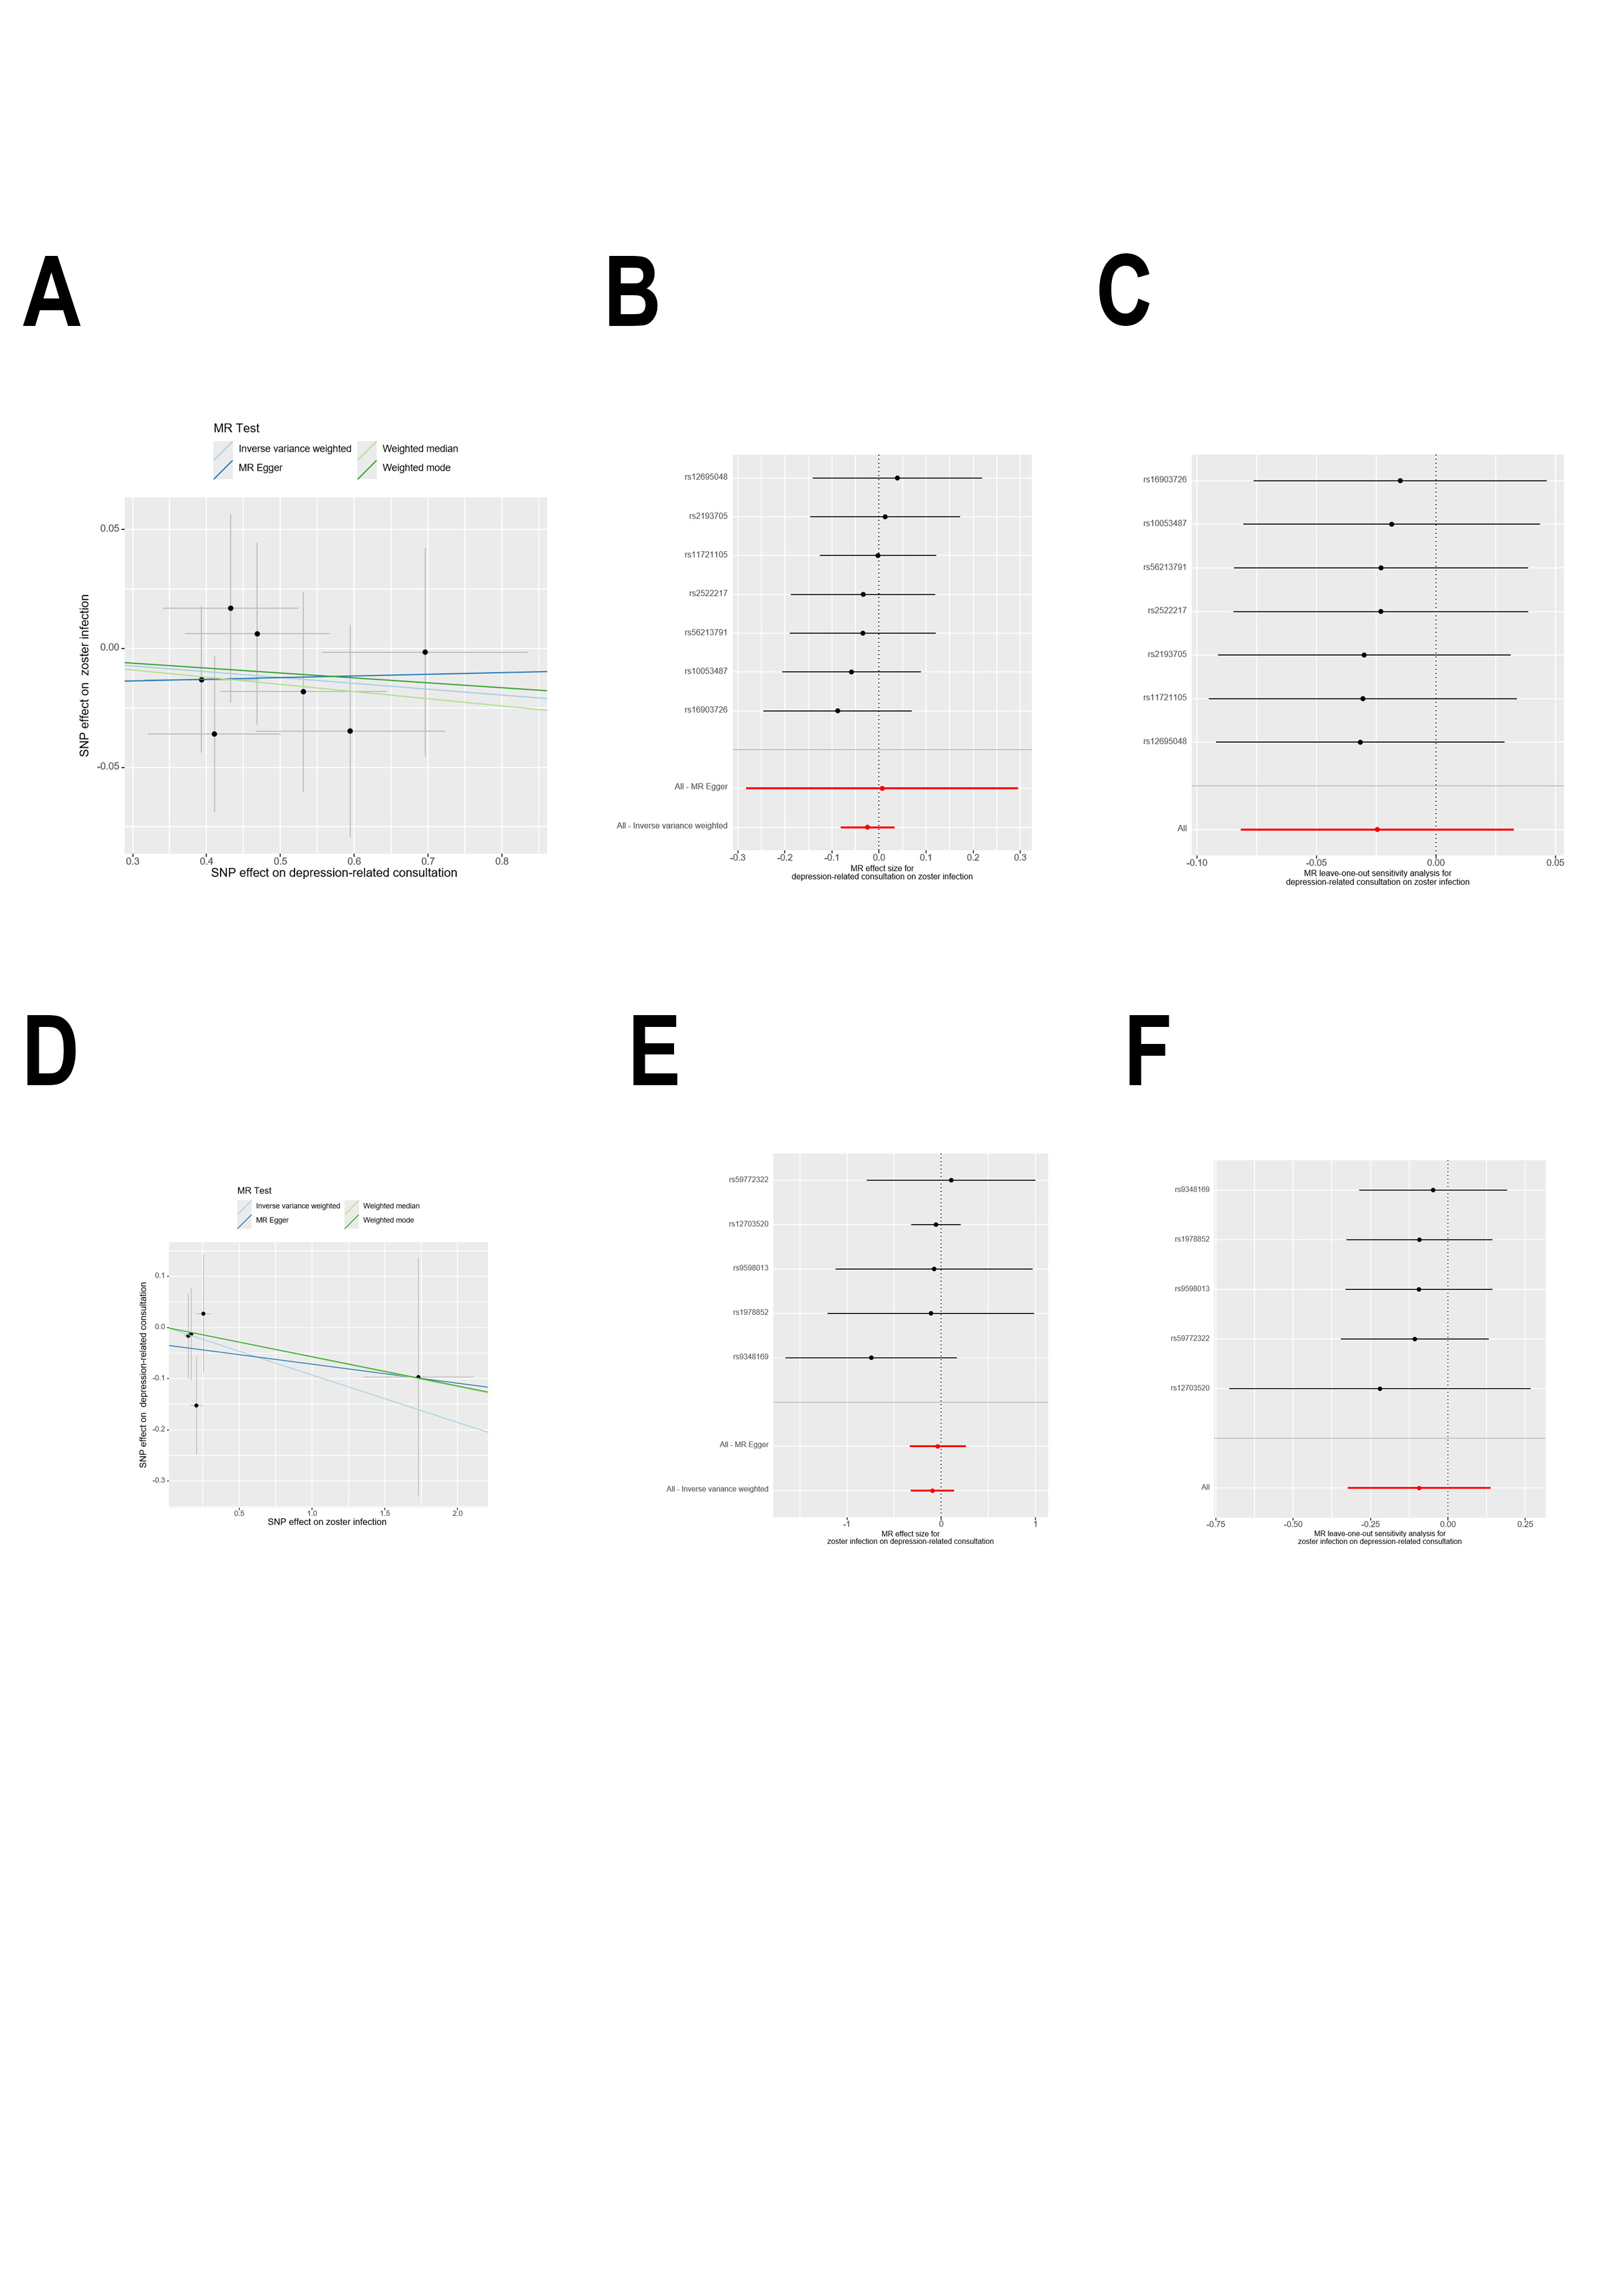


Supplementary Figure 6.

The scatter plot(A), forest plot(B), leave-one-out figure(C) of depression-related consultation on zoster infection

The scatter plot(D), forest plot(E), leave-one-out figure(F) of zoster infection on depression-related consultation

**Supplementary Table 1. STROB**E-MR checklist of recommended items to address in reports of Mendelian randomization studies

| **Item No.** | **Section** | **Checklist item** | **Note/ line No.** |
| --- | --- | --- | --- |
| 1 | **TITLE and ABSTRACT** | Indicate Mendelian randomization (MR) as the study’s design in the title and/or the abstract if that is a main purpose of the study | ‘Mendelian randomization’ in title and abstract |
|
|  | **INTRODUCTION** |  |  |
| 2 | **Background** | Explain the scientific background and rationale for the reported study. What is the exposure? Is a potential causal relationship between exposure and outcome plausible? Justify why MR is a helpful method to address the study question |  |
| Lines 41 to 61 |
|  |
| 3 | **Objectives** | State specific objectives clearly, including pre-specified causal hypotheses (if any). State that MR is a method that, under specific assumptions, intends to estimate causal effects |  |
| Lines 62 to 68 |
|  | **METHODS** |  |  |
| 4 | **Study design and data sources** | Present key elements of the study design early in the article. Consider including a table listing sources of data for all phases of the study. For each data source contributing to the analysis, describe the following: | Main text: Lines 71 – 108 |
| Table 1 |
|  | a) | Setting: Describe the study design and the underlying population, if possible. Describe the setting, locations, and relevant dates, including periods of recruitment, exposure, follow-up, and data collection, when available. |  |
|  | b) | Participants: Give the eligibility criteria, and the sources and methods of selection of participants. Report the sample size, and whether any power or sample size calculations were carried out prior to the main analysis |  |
|  | c) | Describe measurement, quality control and selection of genetic variables |  |
|  | d) | For each exposure, outcome, and other relevant variables, describe methods of assessment and diagnostic criteria for diseases |  |
|  | e) | Provide details of ethics committee approval and participant informed consent, if relevant |  |
| 5 | **Assumptions** | Explicitly state the three core IV assumptions for the main analysis (relevance, independence and exclusion restriction) as well assumptions for any additional or sensitivity analysis | Lines 75-80, Figure 1 |
|
| 6 | **Statistical methods: main analysis** | Describe statistical methods and statistics used |  |
|  | a) | Describe how quantitative variables were handled in the analyses (i.e., scale, units, model) |  |
|  | b) | Describe how genetic variables were handled in the analyses and, if applicable, how their weights were selected |  |
|  | c) | Describe the MR estimator (e.g. two-stage least squares, Wald ratio) and related statistics. Detail the included covariates and, in case of two-sample MR, whether the same covariate set was used for adjustment in the two samples |  |
|  | d) | Explain how missing data were addressed | Lines 122-135 |
|  | e) | If applicable, indicate how multiple testing was addressed |  |
| 7 | **Assessment of assumptions** | Describe any methods or prior knowledge used to assess the assumptions or justify their validity | Lines 122-136 |
| 8 | **Sensitivity analyses and additional analyses** | Describe any sensitivity analyses or additional analyses performed (e.g. comparison of effect estimates from different approaches, independent replication, bias analytic techniques, validation of instruments, simulations) | Lines 122-136 |
| 9 | **Software and pre-registration** |  |  |
|  | a) | Name statistical software and package(s), including version and settings used | Lines 134-136 |
|  | b) | State whether the study protocol and details were pre-registered (as well as when and where) | The research protocol and information are not registered |
|  | **RESULTS** |  |  |
| 10 | **Descriptive data** |  |  |
|  | a) | Report the numbers of individuals at each stage of included studies and reasons for exclusion. Consider use of a flow diagram | Not applicable, since in this study we used genome-wide summary statistics from previously published genome-wide association studies. We cite these in the main text. There is no sample overlap between the exposure and outcome studies |
|  | b) | Report summary statistics for phenotypic exposure(s), outcome(s), and other relevant variables (e.g. means, SDs, proportions) |
|  | c) | If the data sources include meta-analyses of previous studies, provide the assessments of heterogeneity across these studies |
|  | d) | For two-sample MR: |
| i.   Provide justification of the similarity of the genetic variant-exposure associations between the exposure and outcome samples |
| ii.   Provide information on the number of individuals who overlap between the exposure and outcome studies |
|  |
| 11 | **Main results** |  |  |
|  | a) | Report the associations between genetic variant and exposure, and between genetic variant and outcome, preferably on an interpretable scale | Lines 138-201 |
| Figures 2-3 |
|  | b) | Report MR estimates of the relationship between exposure and outcome, and the measures of uncertainty from the MR analysis, on an interpretable scale, such as odds ratio or relative risk per SD difference |  |
|  | c) | If relevant, consider translating estimates of relative risk into absolute risk for a meaningful time period | Table S3-4 and Figures S1-13 |
|  | d) | Consider plots to visualize results (e.g. forest plot, scatterplot of associations between genetic variables and outcome versus between genetic variables and exposure) |  |
| 12 | **Assessment of assumptions** |  |  |
|  | a) | Report the assessment of the validity of the assumptions | Lines 153-201 |
| Figure 3，Table S3-4 |
| Table S4 |
|  | b) | Report any additional statistics (e.g., assessments of heterogeneity across genetic variables, such as I2, Q statistic or E-value) |  |
| 13 | **Sensitivity analyses and additional analyses** |  |  |
|  | a) | Report any sensitivity analyses to assess the robustnes | Lines 153-201 |
| s of the main results to violations of the assumptions | Figure 3，Supplementary Table 3-4 |
|  | b) | Report results from other sensitivity analyses or additional analyses |  |
|  | c) | Report any assessment of direction of causal relationship (e.g., bidirectional MR) |  |
|  | d) | When relevant, report and compare with estimates from non-MR analyses |  |
|  | e) | Consider additional plots to visualize results (e.g., leave-one-out analyses) |  |
|  | **DISCUSSION** |  |  |
| 14 | **Key results** | Summarize key results with reference to study objectives | Lines 203-209 |
| 15 | **Limitations** | Discuss limitations of the study, taking into account the validity of the IV assumptions, other sources of potential bias, and imprecision. Discuss both direction and magnitude of any potential bias and any efforts to address them | Line 265-287 |
|
| 16 | **Interpretation** |  |  |
|  | a) | Meaning: Give a cautious overall interpretation of results in the context of their limitations and in comparison with other studies | Lines 265-287 |
|  | b) | Mechanism: Discuss underlying biological mechanisms that could drive a potential causal relationship between the investigated exposure and the outcome, and whether the gene-environment equivalence assumption is reasonable. Use causal language carefully, clarifying that IV estimates may provide causal effects only under certain assumptions |  |
|  |
|  | c) | Clinical relevance: Discuss whether the results have clinical or public policy relevance, and to what extent they inform effect sizes of possible interventions |  |
| 17 | Generalizability | Discuss the generalizability of the study results (a) to other populations, (b) across other exposure periods/timings, and (c) across other levels of exposure | Lines 265-268 |
|  | **OTHER INFORMATION** |  |  |
| 18 | **Funding** | Describe sources of funding and the role of funders in the present study and, if applicable, sources of funding for the databases and original study or studies on which the present study is based | No Fundings |
| 19 | **Data and data sharing** | Provide the data used to perform all analyses or report where and how the data can be accessed, and reference these sources in the article. Provide the statistical code needed to reproduce the results in the article, or report whether the code is publicly accessible and if so, where | Main text: Availability of data and materials |
| Table S2 |
| The statistical code used in the article is not public, please ask the author for the review if needed. |
| 20 | **Conflicts of Interest** | All authors should declare all potential conflicts of interest | The authors declare that there is no conflict of interest. |

**Supplementary Table 2. Summary of Forward and Re**verse MR analysis of exposures with outcomes

| Exposure | Outcome | MR Analysis | | | | | | | | | |
| --- | --- | --- | --- | --- | --- | --- | --- | --- | --- | --- | --- |
| Method | Nsnp | b | SE | p-value | Lower 95% CI | Upper 95% CI | OR | OR-Lower 95% CI | OR-Upper 95% CI |
| MDD | HZ | Primary Analysis | | | | | | | | | |
| IVW | 71 | 0.076 | 0.089 | 0.393 | -0.099 | 0.252 | 1.079 | 0.906 | 1.286 |
| MR Egger | 71 | -1.139 | 0.504 | 0.027 | -2.126 | -0.151 | 0.320 | 0.119 | 0.859 |
| Weighted median | 71 | 0.109 | 0.128 | 0.393 | -0.142 | 0.360 | 1.115 | 0.868 | 1.434 |
| Weighted mode | 71 | 0.2737855 | 0.278 | 0.328 | -0.271 | 0.818 | 1.315 | 0.763 | 2.267 |
| Second Analysis | | | | | | | | | |
| IVW | 60 | 0.174 | 0.097 | 0.073 | -0.016 | 0.364 | 1.190 | 0.984 | 1.439 |
| MR Egger | 60 | -0.651 | 0.569 | 0.257 | -1.766 | 0.463 | 0.521 | 0.171 | 1.589 |
| Weighted median | 60 | 0.249 | 0.134 | 0.064 | -0.014 | 0.512 | 1.283 | 0.986 | 1.669 |
| Weighted mode | 60 | 0.442 | 0.321 | 0.173 | -0.187 | 1.071 | 1.556 | 0.830 | 2.919 |
| MDD | PHN | IVW | 71 | -0.199 | 0.332 | 0.549 | -0.849 | 0.451 | 0.820 | 0.428 | 1.570 |
| MR Egger | 71 | 3.527 | 1.904 | 0.068 | -0.205 | 7.259 | 34.026 | 0.815 | 1420.619 |
| Weighted median | 71 | 0.150 | 0.481 | 0.755 | -0.793 | 1.093 | 1.162 | 0.453 | 2.982 |
| Weighted mode | 71 | 0.299 | 1.039 | 0.775 | -1.738 | 2.336 | 1.348 | 0.176 | 10.344 |
| depressive status | HZ | IVW | 13 | 0.524 | 0.369 | 0.155 | -0.199 | 1.246 | 1.688 | 0.820 | 3.477 |
| MR Egger | 13 | 4.287 | 3.270 | 0.217 | -2.123 | 10.697 | 72.756 | 0.120 | 44232.633 |
| Weighted median | 13 | 0.560 | 0.544 | 0.303 | -0.506 | 1.626 | 1.751 | 0.603 | 5.083 |
| Weighted mode | 13 | -0.519 | 1.078 | 0.639 | -2.631 | 1.593 | 0.595 | 0.072 | 4.919 |
| depressive status | PHN | Primary Analysis | | | | | | | | | |
| IVW | 13 | 3.131 | 1.857 | 0.092 | -0.509 | 6.771 | 22.896 | 0.601 | 871.971 |
| MR Egger | 13 | 24.965 | 16.241 | 0.152 | -6.866 | 56.797 | 6.956E+10 | 0.001 | 4.641E+24 |
| Weighted median | 13 | 2.244 | 2.062 | 0.276 | -1.797 | 6.285 | 9.433 | 0.166 | 536.497 |
| Weighted mode | 13 | 2.051 | 3.140 | 0.526 | -4.103 | 8.205 | 7.777 | 0.017 | 3660.697 |
| Second Analysis | | | | | | | | | |
| IVW | 11 | 2.994 | 1.512 | 0.048 | 0.031 | 5.957 | 19.967 | 1.031 | 386.535 |
| MR Egger | 11 | -5.099 | 16.983 | 0.771 | -38.386 | 28.188 | 0.006 | 0.000 | 1.746E+12 |
| Weighted median | 11 | 2.311 | 2.032 | 0.256 | -1.673 | 6.295 | 10.083 | 0.188 | 541.586 |
| Weighted mode | 11 | 1.887 | 3.335 | 0.584 | -4.649 | 8.424 | 6.600 | 0.010 | 4552.853 |
| Third Analysis | | | | | | | | | |
| IVW | 6 | 2.255 | 1.907 | 0.237 | -1.484 | 5.994 | 9.535 | 0.227 | 400.820 |
| MR Egger | 6 | 7.564 | 27.801 | 0.799 | -46.926 | 62.054 | 1.928E+03 | 0.000 | 8.905E+26 |
| Weighted median | 6 | 2.002 | 2.302 | 0.384 | -2.510 | 6.513 | 7.401 | 0.081 | 673.644 |
| Weighted mode | 6 | 2.030 | 3.664 | 0.603 | -5.152 | 9.211 | 7.611 | 0.006 | 10008.703 |
| HZ | depressive status | IVW | 7 | 0.001 | 0.006 | 0.816 | -0.010 | 0.013 | 1.001 | 0.990 | 1.013 |
| MR Egger | 7 | -0.001 | 0.021 | 0.957 | -0.042 | 0.040 | 0.999 | 0.959 | 1.041 |
| Weighted median | 7 | 0.000 | 0.007 | 0.955 | -0.014 | 0.015 | 1.000 | 0.986 | 1.015 |
| Weighted mode | 7 | -0.001 | 0.010 | 0.958 | -0.020 | 0.019 | 0.999 | 0.980 | 1.019 |
| depression-related consultation | zoster infection | IVW | 7 | -0.024 | 0.029 | 0.401 | -0.082 | 0.033 | 0.976 | 0.922 | 1.033 |
| MR Egger | 7 | 0.007 | 0.147 | 0.964 | -0.282 | 0.296 | 1.007 | 0.754 | 1.344 |
| Weighted median | 7 | -0.030 | 0.036 | 0.397 | -0.100 | 0.040 | 0.970 | 0.905 | 1.040 |
| Weighted mode | 7 | -0.021 | 0.047 | 0.679 | -0.114 | 0.072 | 0.980 | 0.893 | 1.075 |
| zoster infection | depression-related consultation | IVW | 5 | -0.093 | 0.118 | 0.432 | -0.324 | 0.138 | 0.911 | 0.723 | 1.148 |
| MR Egger | 5 | -0.037 | 0.152 | 0.823 | -0.335 | 0.261 | 0.964 | 0.715 | 1.298 |
| Weighted median | 5 | -0.058 | 0.136 | 0.671 | -0.325 | 0.209 | 0.944 | 0.722 | 1.233 |
| Weighted mode | 5 | -0.057 | 0.134 | 0.693 | -0.320 | 0.206 | 0.945 | 0.726 | 1.229 |

**Supplementary Table 3.** Summary of heterogeneity and pleiotropy test of MR analysis

| Exprosure | Outcome | Sensitivity Analysis | | | |
| --- | --- | --- | --- | --- | --- |
| Heterogeneity test (Cochran Q statistic) | | Pleiotropy test | |
| IVW p | MR-Egger p | MR-Egger p | MR-PRESSO p |
| MDD | HZ | Primary Analysis | | | |
| 0.3820 | 0.5480 | 0.0168 | 0.3950 |
| Second Analysis | | | |
| 0.9608 | 0.9726 | 0.1463 | 0.9680 |
| MDD | PHN | 0.4928 | 0.5939 | 0.0509 | 0.4983 |
| depressive status | HZ | 0.4577 | 0.4852 | 0.2713 | 0.4610 |
| depressive status | PHN | Primary Analysis | | | |
| 0.0494 | 0.0801 | 0.2033 | 0.0600 |
| Second Analysis | | | |
| 0.5520 | 0.4786 | 0.6438 | 0.5623 |
| Third Analysis | | | |
| 0.7540 | 0.6247 | 0.8575 | 0.7380 |
| HZ | depressive status | 0.3085 | 0.2125 | 0.9019 | 0.3500 |
| depression-related consultation | zoster infection | 0.9478 | 0.8992 | 0.8361 | 0.9480 |
| zoster infection | depression-related consultation | 0.6944 | 0.5954 | 0.6036 | 0.7333 |

**Supplementary Table 4. Radial MR for testing the outliers of MDD on HZ**

| SNP | Q_statistic | *P*-value |
| --- | --- | --- |
| rs3823624 | 4.02207281702056 | 0.0449084873465629 |
| rs4346585 | 5.48787718784299 | 0.019148779479412 |
| rs57344483 | 3.90569575905342 | 0.048122697738822 |
| rs5995992 | 5.1312812433631 | 0.023498375610502 |
| rs34488670 | 4.13382782191813 | 0.042034169288079 |

**Supplementary Table 5. Summary of instrumental variables (IVs) details in MR analysis**

| Dataset | | IVs | effect_allele.exposure | other_allele.exposure | effect_allele.outcome | other_allele.outcome | Exposure | | | Outcome | | | F |
| --- | --- | --- | --- | --- | --- | --- | --- | --- | --- | --- | --- | --- | --- |
| b | SE | p | b | SE | p |
| Exposure | Outcome | The forward MR analyses |  |  |  |  |  |  |  |  |  |  |
| MDD | HZ | rs1002656 | T | C | T | C | -0.0266 | 0.0038 | 3.739E-12 | -0.0129415 | 0.0183177 | 0.479875 | 49 |
|  |  | rs10061069 | C | G | C | G | -0.0275 | 0.0042 | 8.152E-11 | -0.0601623 | 0.0309758 | 0.0521087 | 42.87131519 |
|  |  | rs1021363 | A | G | A | G | 0.0303 | 0.0037 | 4.406E-16 | -0.0254735 | 0.0190349 | 0.180814 | 67.06281958 |
|  |  | rs1045430 | T | G | T | G | -0.0253 | 0.0035 | 7.308E-13 | -0.0283702 | 0.0169644 | 0.0944561 | 52.2522449 |
|  |  | rs10774600 | T | C | T | C | -0.0267 | 0.0048 | 3.387E-08 | -0.00887474 | 0.0264878 | 0.737588 | 30.94140625 |
|  |  | rs10789214 | T | C | T | C | 0.0193 | 0.0035 | 4.442E-08 | 0.0123784 | 0.0171198 | 0.469653 | 30.40734694 |
|  |  | rs10817969 | T | G | T | G | 0.0261 | 0.0039 | 3.108E-11 | 0.00492871 | 0.0181864 | 0.786383 | 44.78698225 |
|  |  | rs10913112 | T | C | T | C | -0.0264 | 0.0036 | 3.4E-13 | 0.00620438 | 0.0175843 | 0.724211 | 53.77777778 |
|  |  | rs1095626 | T | C | T | C | -0.0264 | 0.0035 | 7.131E-14 | -0.0144413 | 0.0169939 | 0.395439 | 56.89469388 |
|  |  | rs11135349 | A | C | A | C | -0.0295 | 0.0035 | 6.042E-17 | -0.00941449 | 0.0174116 | 0.588714 | 71.04081633 |
|  |  | rs113188507 | A | G | A | G | 0.0221 | 0.0039 | 1.871E-08 | 0.0186596 | 0.0212264 | 0.37936 | 32.11111111 |
|  |  | rs1152578 | T | C | T | C | -0.0218 | 0.0035 | 6.363E-10 | -0.0208624 | 0.0171472 | 0.223731 | 38.79510204 |
|  |  | rs11579246 | A | G | A | G | 0.0381 | 0.0061 | 5.706E-10 | -0.0379744 | 0.0236158 | 0.107834 | 39.01128729 |
|  |  | rs1226412 | T | C | T | C | 0.0256 | 0.0043 | 3.459E-09 | -0.00142315 | 0.0197257 | 0.942485 | 35.4440238 |
|  |  | rs12967143 | C | G | C | G | -0.0312 | 0.0038 | 3.699E-16 | -0.01311 | 0.0195181 | 0.501783 | 67.41274238 |
|  |  | rs1343605 | A | C | A | C | 0.0313 | 0.0036 | 6.229E-18 | 0.00804244 | 0.0175163 | 0.646133 | 75.5933642 |
|  |  | rs1409379 | T | C | T | C | 0.0249 | 0.0041 | 1.671E-09 | -0.0019406 | 0.0183231 | 0.915654 | 36.88340274 |
|  |  | rs141954845 | A | G | A | G | 0.0229 | 0.0037 | 8.145E-10 | 0.0138171 | 0.0171186 | 0.419586 | 38.30606282 |
|  |  | rs143186028 | T | G | T | G | 0.0277 | 0.0046 | 2.288E-09 | -0.00340089 | 0.0196832 | 0.862823 | 36.26134216 |
|  |  | rs1448938 | A | G | A | G | 0.0214 | 0.0035 | 1.297E-09 | 0.00463605 | 0.0169396 | 0.78433 | 37.3844898 |
|  |  | rs1466887 | T | C | T | C | -0.0199 | 0.0036 | 4.118E-08 | 0.0206336 | 0.0171802 | 0.229747 | 30.55632716 |
|  |  | rs1568452 | T | C | T | C | 0.0248 | 0.0036 | 8.118E-12 | -0.00794611 | 0.0178031 | 0.655356 | 47.45679012 |
|  |  | rs1890946 | T | C | T | C | -0.0235 | 0.0035 | 2.68E-11 | -0.00706871 | 0.0169771 | 0.677141 | 45.08163265 |
|  |  | rs1982277 | T | C | T | C | 0.0279 | 0.0041 | 1.447E-11 | -0.00824627 | 0.0215776 | 0.702338 | 46.30636526 |
|  |  | rs198457 | T | C | T | C | -0.0292 | 0.0046 | 2.986E-10 | -0.0319868 | 0.0282199 | 0.257011 | 40.29489603 |
|  |  | rs200949 | A | G | A | G | 0.048 | 0.0053 | 2.525E-19 | 0.0158472 | 0.0347098 | 0.647987 | 82.02207191 |
|  |  | rs2509805 | T | C | T | C | 0.022 | 0.0038 | 9.17E-09 | 0.0186823 | 0.0176255 | 0.289162 | 33.51800554 |
|  |  | rs301799 | T | C | T | C | -0.025 | 0.0035 | 1.356E-12 | 0.00594021 | 0.0178301 | 0.739016 | 51.02040816 |
|  |  | rs30266 | A | G | A | G | 0.0308 | 0.0037 | 1.445E-16 | 0.00163122 | 0.0187044 | 0.930504 | 69.29437546 |
|  |  | rs3099439 | T | C | T | C | -0.0276 | 0.0035 | 5.049E-15 | -0.0144228 | 0.0170668 | 0.398067 | 62.1844898 |
|  |  | rs3213572 | A | G | A | G | 0.0217 | 0.0035 | 7.612E-10 | 0.0163773 | 0.0170668 | 0.337257 | 38.44 |
|  |  | rs33431 | T | C | T | C | 0.0198 | 0.0036 | 4.812E-08 | 0.0152082 | 0.0177686 | 0.392052 | 30.25 |
|  |  | rs35553410 | T | C | T | C | -0.0244 | 0.004 | 1.417E-09 | 0.0111062 | 0.019699 | 0.572892 | 37.21 |
|  |  | rs3793577 | A | G | A | G | -0.0229 | 0.0035 | 8.411E-11 | -0.0277465 | 0.017031 | 0.103277 | 42.80897959 |
|  |  | rs45510091 | A | G | A | G | 0.0448 | 0.008 | 1.826E-08 | -0.0239059 | 0.0394709 | 0.544741 | 31.36 |
|  |  | rs4772087 | T | C | T | C | 0.0227 | 0.0036 | 3.911E-10 | -0.0172863 | 0.0172774 | 0.317062 | 39.76003086 |
|  |  | rs56314503 | T | G | T | G | -0.0254 | 0.004 | 2.945E-10 | -0.000798962 | 0.0204493 | 0.968834 | 40.3225 |
|  |  | rs56887639 | A | G | A | G | -0.0278 | 0.0039 | 1.506E-12 | -0.00452826 | 0.0182139 | 0.803659 | 50.81130835 |
|  |  | rs58104186 | A | G | A | G | 0.0237 | 0.0035 | 1.819E-11 | 0.0141292 | 0.0170632 | 0.40764 | 45.8522449 |
|  |  | rs60157091 | T | C | T | C | 0.02 | 0.0035 | 1.421E-08 | -0.0227894 | 0.0169596 | 0.17903 | 32.65306122 |
|  |  | rs61902811 | A | G | A | G | -0.0257 | 0.0036 | 1.395E-12 | -0.0216525 | 0.0210243 | 0.303067 | 50.96373457 |
|  |  | rs61990288 | A | G | A | G | -0.026 | 0.0035 | 1.681E-13 | -0.0029135 | 0.0169896 | 0.86384 | 55.18367347 |
|  |  | rs6783233 | T | C | T | C | 0.0218 | 0.0039 | 2.903E-08 | 0.015174 | 0.0206766 | 0.463027 | 31.2452334 |
|  |  | rs7030813 | T | C | T | C | 0.0253 | 0.0036 | 3.074E-12 | 0.0165338 | 0.0170215 | 0.331375 | 49.38966049 |
|  |  | rs7200826 | T | C | T | C | 0.028 | 0.004 | 3.739E-12 | -0.00973024 | 0.0180308 | 0.589442 | 49 |
|  |  | rs7241572 | A | G | A | G | 0.028 | 0.0044 | 2.698E-10 | 0.0198019 | 0.0207029 | 0.338831 | 40.49586777 |
|  |  | rs725616 | T | C | T | C | 0.0204 | 0.0036 | 1.871E-08 | 0.0232273 | 0.0173669 | 0.181076 | 32.11111111 |
|  |  | rs75581564 | A | G | A | G | 0.0301 | 0.0054 | 3.172E-08 | -0.0114021 | 0.0250595 | 0.649108 | 31.07030178 |
|  |  | rs7585722 | T | C | T | C | -0.0269 | 0.0048 | 2.675E-08 | -0.0092652 | 0.0294693 | 0.753217 | 31.40668403 |
|  |  | rs7659414 | A | C | A | C | -0.0201 | 0.0035 | 1.204E-08 | 0.0113828 | 0.0176674 | 0.51939 | 32.98040816 |
|  |  | rs7685686 | A | G | A | G | 0.0202 | 0.0036 | 2.571E-08 | 0.0256189 | 0.0170318 | 0.132535 | 31.4845679 |
|  |  | rs78337797 | T | G | T | G | 0.0306 | 0.0055 | 3.365E-08 | -0.01989 | 0.0287229 | 0.488635 | 30.95404959 |
|  |  | rs7837935 | T | G | T | G | -0.0292 | 0.0049 | 3.343E-09 | 0.0141661 | 0.0259025 | 0.584445 | 35.51187005 |
|  |  | rs7932640 | T | C | T | C | 0.0281 | 0.0035 | 1.62E-15 | -0.0101697 | 0.0170061 | 0.549837 | 64.45795918 |
|  |  | rs79924686 | T | C | T | C | -0.0597 | 0.0107 | 2.281E-08 | -0.0407827 | 0.0656099 | 0.534209 | 31.13014237 |
|  |  | rs8037355 | T | C | T | C | -0.0233 | 0.0035 | 3.936E-11 | 0.0193327 | 0.0170106 | 0.255744 | 44.31755102 |
|  |  | rs9363467 | T | C | T | C | 0.0237 | 0.0036 | 6.437E-11 | 0.0149648 | 0.0173011 | 0.387059 | 43.34027778 |
|  |  | rs9545360 | A | C | A | C | -0.0271 | 0.0046 | 5.021E-09 | 0.0151318 | 0.0241802 | 0.531451 | 34.70746692 |
|  |  | rs9592461 | A | G | A | G | 0.0216 | 0.0035 | 9.1E-10 | 0.0148139 | 0.0170619 | 0.385261 | 38.08653061 |
|  |  | rs997934 | T | C | T | C | 0.0198 | 0.0036 | 4.812E-08 | 0.010155 | 0.0170762 | 0.552053 | 30.25 |
| MDD | PHN | rs1002656 | T | C | T | C | -0.0266 | 0.0038 | 3.739E-12 | -0.04642 | 0.0692178 | 0.502452 | 49 |
|  |  | rs10061069 | C | G | C | G | -0.0275 | 0.0042 | 8.152E-11 | 0.280006 | 0.117742 | 0.0174004 | 42.87131519 |
|  |  | rs10149470 | A | G | A | G | -0.0267 | 0.0035 | 3.718E-14 | -0.0142639 | 0.0643631 | 0.824613 | 58.19510204 |
|  |  | rs1021363 | A | G | A | G | 0.0303 | 0.0037 | 4.406E-16 | 0.015319 | 0.0720921 | 0.831723 | 67.06281958 |
|  |  | rs1045430 | T | G | T | G | -0.0253 | 0.0035 | 7.308E-13 | -0.0720007 | 0.0641783 | 0.261911 | 52.2522449 |
|  |  | rs10774600 | T | C | T | C | -0.0267 | 0.0048 | 3.387E-08 | 0.0532625 | 0.100508 | 0.596157 | 30.94140625 |
|  |  | rs10789214 | T | C | T | C | 0.0193 | 0.0035 | 4.442E-08 | -0.0875571 | 0.0647305 | 0.17617 | 30.40734694 |
|  |  | rs10817969 | T | G | T | G | 0.0261 | 0.0039 | 3.108E-11 | -0.0367407 | 0.0687726 | 0.593179 | 44.78698225 |
|  |  | rs10913112 | T | C | T | C | -0.0264 | 0.0036 | 3.4E-13 | -0.0370081 | 0.0665443 | 0.578113 | 53.77777778 |
|  |  | rs1095626 | T | C | T | C | -0.0264 | 0.0035 | 7.131E-14 | 0.118703 | 0.0644221 | 0.0653913 | 56.89469388 |
|  |  | rs11135349 | A | C | A | C | -0.0295 | 0.0035 | 6.042E-17 | -0.0587794 | 0.0659634 | 0.372881 | 71.04081633 |
|  |  | rs113188507 | A | G | A | G | 0.0221 | 0.0039 | 1.871E-08 | 0.0428614 | 0.0802237 | 0.593152 | 32.11111111 |
|  |  | rs1152578 | T | C | T | C | -0.0218 | 0.0035 | 6.363E-10 | 0.0288016 | 0.0648711 | 0.657055 | 38.79510204 |
|  |  | rs11579246 | A | G | A | G | 0.0381 | 0.0061 | 5.706E-10 | 0.102547 | 0.0888987 | 0.248693 | 39.01128729 |
|  |  | rs1226412 | T | C | T | C | 0.0256 | 0.0043 | 3.459E-09 | -0.0179299 | 0.0748114 | 0.810587 | 35.4440238 |
|  |  | rs12967143 | C | G | C | G | -0.0312 | 0.0038 | 3.699E-16 | 0.0326101 | 0.0735492 | 0.657491 | 67.41274238 |
|  |  | rs12967855 | A | G | A | G | 0.0265 | 0.0037 | 1.18E-12 | -0.0454445 | 0.0727214 | 0.532029 | 51.29656684 |
|  |  | rs1343605 | A | C | A | C | 0.0313 | 0.0036 | 6.229E-18 | 0.0200084 | 0.0663975 | 0.763152 | 75.5933642 |
|  |  | rs1409379 | T | C | T | C | 0.0249 | 0.0041 | 1.671E-09 | -0.0715976 | 0.0695535 | 0.303297 | 36.88340274 |
|  |  | rs141954845 | A | G | A | G | 0.0229 | 0.0037 | 8.145E-10 | 0.0340227 | 0.064768 | 0.599374 | 38.30606282 |
|  |  | rs143186028 | T | G | T | G | 0.0277 | 0.0046 | 2.288E-09 | -0.0303033 | 0.0743165 | 0.68345 | 36.26134216 |
|  |  | rs1448938 | A | G | A | G | 0.0214 | 0.0035 | 1.297E-09 | -0.029898 | 0.0641821 | 0.641337 | 37.3844898 |
|  |  | rs1466887 | T | C | T | C | -0.0199 | 0.0036 | 4.118E-08 | 0.0244374 | 0.0650916 | 0.70734 | 30.55632716 |
|  |  | rs1568452 | T | C | T | C | 0.0248 | 0.0036 | 8.118E-12 | 0.0954373 | 0.0674832 | 0.157292 | 47.45679012 |
|  |  | rs17641524 | T | C | T | C | -0.032 | 0.0043 | 1.522E-13 | 0.0972386 | 0.0912214 | 0.286441 | 55.38128718 |
|  |  | rs1890946 | T | C | T | C | -0.0235 | 0.0035 | 2.68E-11 | -0.0244074 | 0.064459 | 0.704948 | 45.08163265 |
|  |  | rs1982277 | T | C | T | C | 0.0279 | 0.0041 | 1.447E-11 | -0.144979 | 0.0818626 | 0.0765597 | 46.30636526 |
|  |  | rs198457 | T | C | T | C | -0.0292 | 0.0046 | 2.986E-10 | -0.18065 | 0.107423 | 0.0926339 | 40.29489603 |
|  |  | rs200949 | A | G | A | G | 0.048 | 0.0053 | 2.525E-19 | 0.128648 | 0.131874 | 0.329292 | 82.02207191 |
|  |  | rs2043539 | A | G | A | G | 0.0273 | 0.0035 | 9.893E-15 | -0.0938236 | 0.0666021 | 0.158918 | 60.84 |
|  |  | rs2509805 | T | C | T | C | 0.022 | 0.0038 | 9.17E-09 | 0.10436 | 0.0666652 | 0.117483 | 33.51800554 |
|  |  | rs2568958 | A | G | A | G | 0.0373 | 0.0036 | 8.473E-25 | -0.0185557 | 0.0671284 | 0.782224 | 107.3526235 |
|  |  | rs301799 | T | C | T | C | -0.025 | 0.0035 | 1.356E-12 | -0.0169169 | 0.0675849 | 0.802351 | 51.02040816 |
|  |  | rs30266 | A | G | A | G | 0.0308 | 0.0037 | 1.445E-16 | 0.00812154 | 0.0710183 | 0.908954 | 69.29437546 |
|  |  | rs3099439 | T | C | T | C | -0.0276 | 0.0035 | 5.049E-15 | -0.0221271 | 0.0645816 | 0.731882 | 62.1844898 |
|  |  | rs3213572 | A | G | A | G | 0.0217 | 0.0035 | 7.612E-10 | 0.0186543 | 0.0644989 | 0.772414 | 38.44 |
|  |  | rs33431 | T | C | T | C | 0.0198 | 0.0036 | 4.812E-08 | -0.0172755 | 0.0671938 | 0.797102 | 30.25 |
|  |  | rs34488670 | T | C | T | C | -0.0252 | 0.0043 | 6.033E-09 | 0.0411145 | 0.0770645 | 0.593682 | 34.34505138 |
|  |  | rs34937911 | T | C | T | C | 0.0304 | 0.0055 | 4.13E-08 | 0.142922 | 0.101678 | 0.159835 | 30.5507438 |
|  |  | rs35553410 | T | C | T | C | -0.0244 | 0.004 | 1.417E-09 | 0.13174 | 0.0746394 | 0.0775604 | 37.21 |
|  |  | rs3793577 | A | G | A | G | -0.0229 | 0.0035 | 8.411E-11 | -0.021046 | 0.0643858 | 0.743764 | 42.80897959 |
|  |  | rs3823624 | T | C | T | C | 0.0272 | 0.0045 | 1.992E-09 | 0.00414775 | 0.0714456 | 0.953705 | 36.53530864 |
|  |  | rs4346585 | T | C | T | C | -0.0236 | 0.0038 | 7.127E-10 | -0.0123048 | 0.0679658 | 0.856332 | 38.57063712 |
|  |  | rs45510091 | A | G | A | G | 0.0448 | 0.008 | 1.826E-08 | 0.120446 | 0.147303 | 0.413541 | 31.36 |
|  |  | rs4772087 | T | C | T | C | 0.0227 | 0.0036 | 3.911E-10 | 0.0273428 | 0.0653296 | 0.675555 | 39.76003086 |
|  |  | rs56314503 | T | G | T | G | -0.0254 | 0.004 | 2.945E-10 | 0.0434761 | 0.0773436 | 0.574037 | 40.3225 |
|  |  | rs56887639 | A | G | A | G | -0.0278 | 0.0039 | 1.506E-12 | 0.0436653 | 0.0689554 | 0.526577 | 50.81130835 |
|  |  | rs57344483 | A | G | A | G | -0.038 | 0.0068 | 1.818E-08 | 0.00884984 | 0.0972699 | 0.927507 | 31.2283737 |
|  |  | rs58104186 | A | G | A | G | 0.0237 | 0.0035 | 1.819E-11 | -0.125259 | 0.0646464 | 0.052672 | 45.8522449 |
|  |  | rs5995992 | T | C | T | C | -0.0266 | 0.0039 | 1.3E-11 | 0.124233 | 0.0689412 | 0.0715435 | 46.51939513 |
|  |  | rs60157091 | T | C | T | C | 0.02 | 0.0035 | 1.421E-08 | 0.0666912 | 0.0642471 | 0.29925 | 32.65306122 |
|  |  | rs61902811 | A | G | A | G | -0.0257 | 0.0036 | 1.395E-12 | -0.0152063 | 0.079615 | 0.848528 | 50.96373457 |
|  |  | rs61990288 | A | G | A | G | -0.026 | 0.0035 | 1.681E-13 | 0.00581555 | 0.0643878 | 0.928032 | 55.18367347 |
|  |  | rs6783233 | T | C | T | C | 0.0218 | 0.0039 | 2.903E-08 | -0.0350393 | 0.0781823 | 0.654027 | 31.2452334 |
|  |  | rs7030813 | T | C | T | C | 0.0253 | 0.0036 | 3.074E-12 | -0.0815688 | 0.0643589 | 0.205011 | 49.38966049 |
|  |  | rs7200826 | T | C | T | C | 0.028 | 0.004 | 3.739E-12 | 0.0919964 | 0.0681845 | 0.177264 | 49 |
|  |  | rs7241572 | A | G | A | G | 0.028 | 0.0044 | 2.698E-10 | 0.169329 | 0.0784446 | 0.030883 | 40.49586777 |
|  |  | rs725616 | T | C | T | C | 0.0204 | 0.0036 | 1.871E-08 | -0.0397179 | 0.0656371 | 0.545104 | 32.11111111 |
|  |  | rs75581564 | A | G | A | G | 0.0301 | 0.0054 | 3.172E-08 | -0.0808813 | 0.0945259 | 0.39219 | 31.07030178 |
|  |  | rs7585722 | T | C | T | C | -0.0269 | 0.0048 | 2.675E-08 | -0.101623 | 0.112207 | 0.365109 | 31.40668403 |
|  |  | rs7659414 | A | C | A | C | -0.0201 | 0.0035 | 1.204E-08 | -0.0353684 | 0.0668232 | 0.596609 | 32.98040816 |
|  |  | rs7685686 | A | G | A | G | 0.0202 | 0.0036 | 2.571E-08 | -0.0676855 | 0.0645828 | 0.29462 | 31.4845679 |
|  |  | rs78337797 | T | G | T | G | 0.0306 | 0.0055 | 3.365E-08 | 0.0716566 | 0.108698 | 0.509749 | 30.95404959 |
|  |  | rs7837935 | T | G | T | G | -0.0292 | 0.0049 | 3.343E-09 | -0.101006 | 0.0986919 | 0.306096 | 35.51187005 |
|  |  | rs7932640 | T | C | T | C | 0.0281 | 0.0035 | 1.62E-15 | 0.00396203 | 0.0643975 | 0.950941 | 64.45795918 |
|  |  | rs79924686 | T | C | T | C | -0.0597 | 0.0107 | 2.281E-08 | -0.370734 | 0.246278 | 0.132234 | 31.13014237 |
|  |  | rs8037355 | T | C | T | C | -0.0233 | 0.0035 | 3.936E-11 | 0.107086 | 0.0643132 | 0.0958981 | 44.31755102 |
|  |  | rs9363467 | T | C | T | C | 0.0237 | 0.0036 | 6.437E-11 | -0.0414302 | 0.0654373 | 0.52665 | 43.34027778 |
|  |  | rs9545360 | A | C | A | C | -0.0271 | 0.0046 | 5.021E-09 | -0.00614433 | 0.0916452 | 0.946546 | 34.70746692 |
|  |  | rs9592461 | A | G | A | G | 0.0216 | 0.0035 | 9.1E-10 | -0.0987622 | 0.0645699 | 0.12613 | 38.08653061 |
|  |  | rs997934 | T | C | T | C | 0.0198 | 0.0036 | 4.812E-08 | 0.0112055 | 0.0644339 | 0.861939 | 30.25 |
| depressive status | HZ | rs10850805 | G | A | G | A | 0.013201204 | 0.002312114 | 1.09999E-08 | -0.00327371 | 0.0193987 | 0.865986 | 32.59931819 |
|  |  | rs10860942 | A | G | A | G | 0.015579334 | 0.002763782 | 1.7E-08 | 0.00830796 | 0.0249564 | 0.73921 | 31.77533555 |
|  |  | rs10992800 | A | G | A | G | -0.014984518 | 0.002173082 | 5.40008E-12 | 0.00462954 | 0.0172709 | 0.788657 | 47.54809739 |
|  |  | rs11250033 | A | G | A | G | -0.012484065 | 0.002198201 | 1.40001E-08 | -0.0123837 | 0.0184759 | 0.50269 | 32.25352809 |
|  |  | rs12330258 | C | T | C | T | 0.01299119 | 0.002170085 | 2.1E-09 | -0.0179463 | 0.0179819 | 0.318269 | 35.83803877 |
|  |  | rs1427027 | T | C | T | C | 0.014863065 | 0.002404448 | 6.29999E-10 | -0.0157319 | 0.018883 | 0.404775 | 38.21077913 |
|  |  | rs28628885 | G | A | G | A | 0.015170704 | 0.002136184 | 1.20005E-12 | 0.0400503 | 0.017094 | 0.0191324 | 50.43524215 |
|  |  | rs3793577 | G | A | G | A | 0.013251431 | 0.002130773 | 5E-10 | 0.0277465 | 0.017031 | 0.103277 | 38.67684542 |
|  |  | rs4636406 | T | G | T | G | -0.012101082 | 0.002125132 | 1.2E-08 | 0.00960233 | 0.0169595 | 0.571264 | 32.42474243 |
|  |  | rs618869 | C | T | C | T | 0.019015291 | 0.003022085 | 3.09999E-10 | 0.0257639 | 0.0253979 | 0.310386 | 39.59063921 |
|  |  | rs634379 | T | C | T | C | -0.012702931 | 0.002280848 | 2.59998E-08 | -0.0126611 | 0.0176042 | 0.472012 | 31.0180924 |
|  |  | rs7562866 | A | T | A | T | 0.015334957 | 0.002588755 | 3.09999E-09 | 0.0224492 | 0.0190543 | 0.238729 | 35.08998151 |
|  |  | rs7937151 | G | T | G | T | 0.012835411 | 0.002181787 | 4E-09 | -0.00613234 | 0.0176896 | 0.728845 | 34.60947523 |
| depressive status | PHN | rs10992800 | A | G | A | G | -0.014984518 | 0.002173082 | 5.40008E-12 | 0.0294387 | 0.0655852 | 0.653531 | 47.54809739 |
|  |  | rs1427027 | T | C | T | C | 0.014863065 | 0.002404448 | 6.29999E-10 | 0.0082286 | 0.0712702 | 0.908083 | 38.21077913 |
|  |  | rs28628885 | G | A | G | A | 0.015170704 | 0.002136184 | 1.20005E-12 | 0.115156 | 0.0647742 | 0.0754345 | 50.43524215 |
|  |  | rs3793577 | G | A | G | A | 0.013251431 | 0.002130773 | 5E-10 | 0.021046 | 0.0643858 | 0.743764 | 38.67684542 |
|  |  | rs7562866 | A | T | A | T | 0.015334957 | 0.002588755 | 3.09999E-09 | 0.0421671 | 0.0720773 | 0.558529 | 35.08998151 |
|  |  | rs7937151 | G | T | G | T | 0.012835411 | 0.002181787 | 4E-09 | 0.0315365 | 0.0670163 | 0.63794 | 34.60947523 |
| HZ | depressive status | rs10863254 | C | T | C | T | -0.0949468 | 0.019096 | 6.6243E-07 | 0.00251382 | 0.00151709 | 0.0980009 | 24.72155886 |
|  |  | rs17577980 | A | G | A | G | -0.234212 | 0.0417362 | 2.00332E-08 | 0.00124364 | 0.00250539 | 0.62 | 31.49143678 |
|  |  | rs17882041 | A | G | A | G | -0.0989395 | 0.0211266 | 2.82462E-06 | -0.00222659 | 0.00175382 | 0.2 | 21.93209928 |
|  |  | rs62482377 | C | G | C | G | -0.132626 | 0.0273423 | 1.23101E-06 | -0.00161879 | 0.0019312 | 0.4 | 23.52812153 |
|  |  | rs74887568 | C | T | C | T | 0.1427 | 0.029234 | 1.0539E-06 | 0.000744023 | 0.00218454 | 0.73 | 23.827115 |
|  |  | rs7955673 | T | C | T | C | 0.098703 | 0.0215025 | 4.42599E-06 | 0.00207483 | 0.00165151 | 0.21 | 21.07088579 |
|  |  | rs8181185 | C | A | C | A | 0.0888771 | 0.0173167 | 2.85996E-07 | -0.000585004 | 0.00131106 | 0.66 | 26.34204483 |
| depression-related consultation | zoster infection | rs10053487 | A | C | A | C | 0.5944 | 0.1285 | 3.71304E-06 | -0.0347368 | 0.0447565 | 0.437672 | 21.3969241 |
|  |  | rs11721105 | T | C | T | C | 0.696 | 0.1392 | 5.71702E-07 | -0.00155437 | 0.0439422 | 0.971782 | 25 |
|  |  | rs12695048 | T | C | T | C | 0.4327 | 0.09179 | 2.42499E-06 | 0.016905 | 0.0397362 | 0.670522 | 22.22199526 |
|  |  | rs16903726 | T | C | T | C | 0.4106 | 0.08991 | 4.96204E-06 | -0.0359797 | 0.0330046 | 0.275651 | 20.85556187 |
|  |  | rs2193705 | A | G | A | G | -0.4687 | 0.098 | 1.72799E-06 | -0.00612866 | 0.0381916 | 0.87251 | 22.8737703 |
|  |  | rs2522217 | G | T | G | T | 0.3933 | 0.07825 | 4.98804E-07 | -0.013169 | 0.0307705 | 0.66867 | 25.26266717 |
|  |  | rs56213791 | C | G | C | G | -0.5311 | 0.1124 | 0.000002305 | 0.0181855 | 0.0420805 | 0.665624 | 22.32646576 |
| zoster infection | depression-related consultation | rs12703520 | A | G | A | G | 1.73015 | 0.378186 | 4.76541E-06 | -0.09679 | 0.2317 | 0.6762 | 20.92939231 |
|  |  | rs1978852 | T | C | T | C | 0.150001 | 0.0323549 | 3.55018E-06 | -0.01632 | 0.08377 | 0.8455 | 21.49355163 |
|  |  | rs59772322 | G | C | G | C | -0.253687 | 0.0523576 | 1.26439E-06 | -0.02699 | 0.1158 | 0.8158 | 23.47669532 |
|  |  | rs9348169 | G | A | G | A | 0.205592 | 0.0446076 | 4.04809E-06 | -0.1524 | 0.0953 | 0.1097 | 21.2419659 |
|  |  | rs9598013 | A | C | A | C | -0.169653 | 0.0358035 | 2.15357E-06 | 0.01273 | 0.09037 | 0.888 | 22.45288337 |

**Supplementary Table 6. Radial MR for testing the outliers of depressive status on PHN**

| SNP | Q_statistic | *P*.value |
| --- | --- | --- |
| rs12330258 | 5.35977756896143 | 0.0206064017647197 |
| rs618869 | 6.82029355494135 | 0.00901277523124184 |
